# Supplementary material for: RECQ helicases are deregulated in hematological malignancies in association with a prognostic value
Source: Springer Nature journal article supplement (doi:10.1186/s40364-016-0057-4), 2016-02-13

# RECQ1 expression

CELL LINE ATLAS ? »

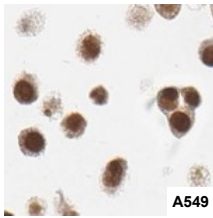

|                           |                                                            |
|---------------------------|------------------------------------------------------------|
| <b>Gene description</b>   | RecQ helicase-like                                         |
| <b>RNA expression</b>     | Transcript detected at medium/high level in 38 cell lines  |
| <b>Protein expression</b> | Protein detected at medium/high level in 45 cell lines     |
| <b>Protein class</b>      | Enzymes, Plasma proteins, Predicted intracellular proteins |
| <b>Reliability</b>        | Supportive                                                 |

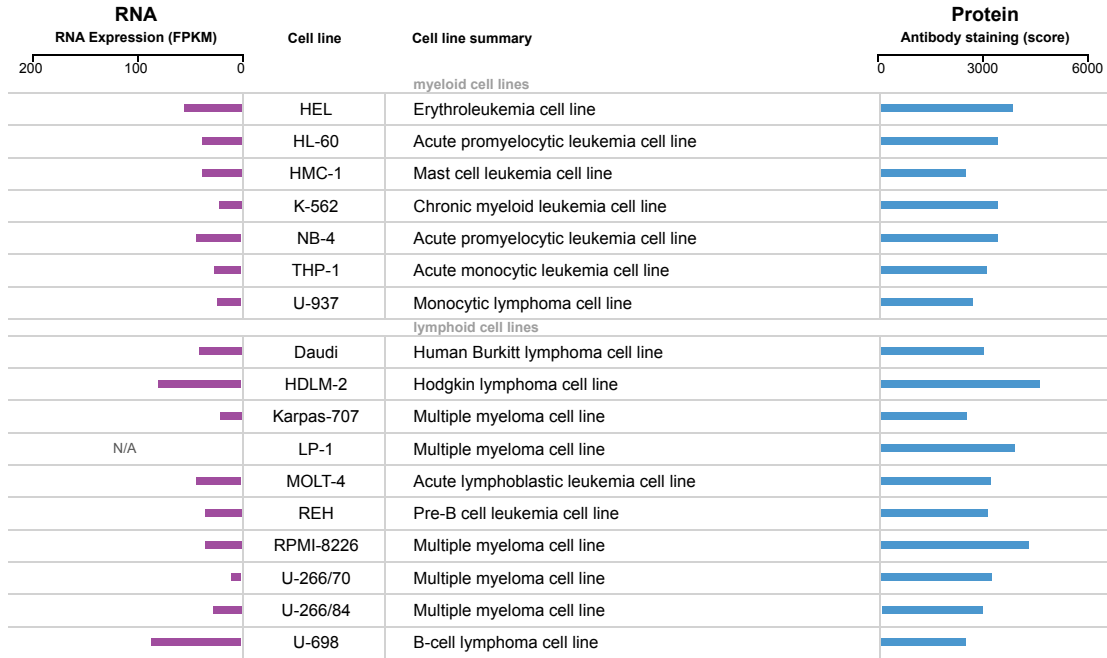

# BLM expression

CELL LINE ATLAS ? »

|                           |                                                                                                                                 |
|---------------------------|---------------------------------------------------------------------------------------------------------------------------------|
| <b>Gene description</b>   | Bloom syndrome, RecQ helicase-like                                                                                              |
| <b>RNA expression</b>     | Transcript detected at only low levels                                                                                          |
| <b>Protein expression</b> | Pending cell analysis                                                                                                           |
| <b>Protein class</b>      | Cancer-related genes, Disease related genes, Enzymes, Plasma proteins, Potential drug targets, Predicted intracellular proteins |

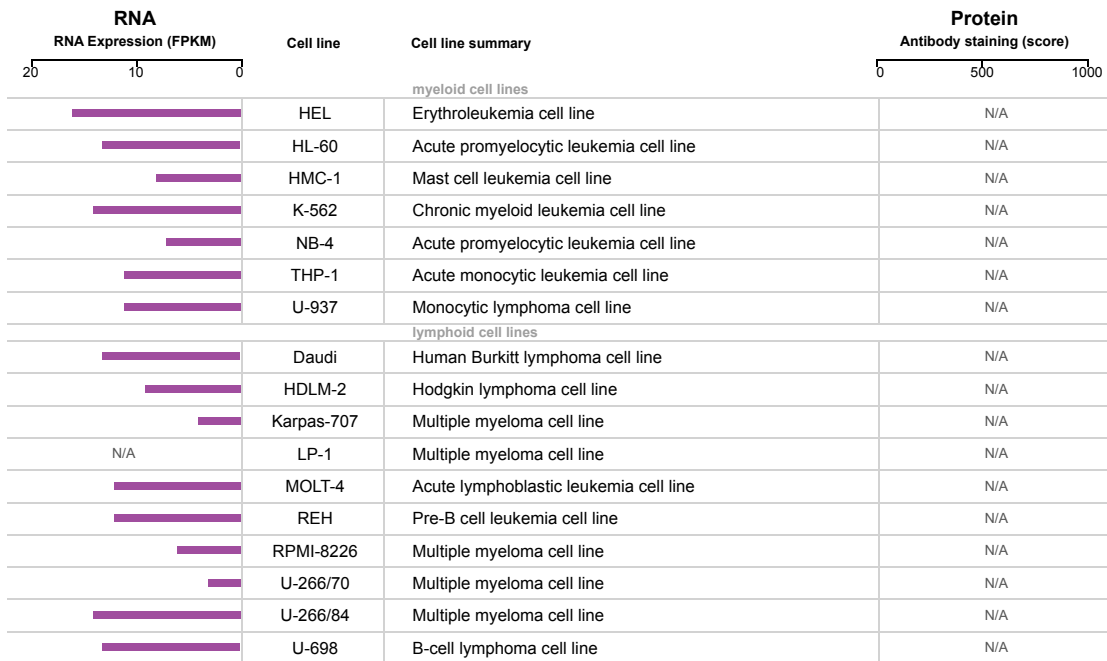

# WRN expression

CELL LINE ATLAS ? »

|                           |                                                                                                                                 |
|---------------------------|---------------------------------------------------------------------------------------------------------------------------------|
| <b>Gene description</b>   | Werner syndrome, RecQ helicase-like                                                                                             |
| <b>RNA expression</b>     | Transcript detected at medium/high level in 1 cell lines                                                                        |
| <b>Protein expression</b> | Pending cell analysis                                                                                                           |
| <b>Protein class</b>      | Cancer-related genes, Disease related genes, Enzymes, Plasma proteins, Potential drug targets, Predicted intracellular proteins |

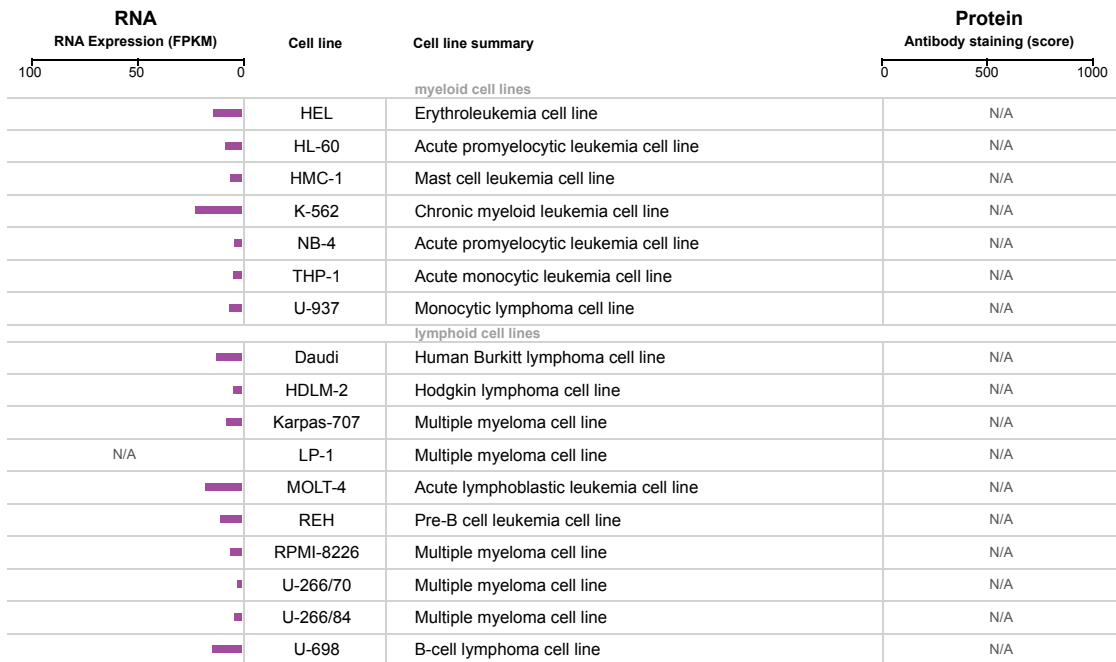

# RECQ4 expression

CELL LINE ATLAS ? »

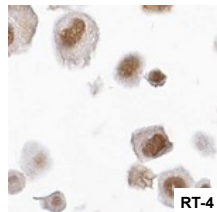

|                           |                                                           |
|---------------------------|-----------------------------------------------------------|
| <b>Gene description</b>   | RecQ protein-like 4                                       |
| <b>RNA expression</b>     | Transcript detected at medium/high level in 22 cell lines |
| <b>Protein expression</b> | Protein detected at medium/high level in 38 cell lines    |
| <b>Protein class</b>      | Cancer-related genes, Predicted intracellular proteins    |
| <b>Reliability</b>        | Uncertain                                                 |

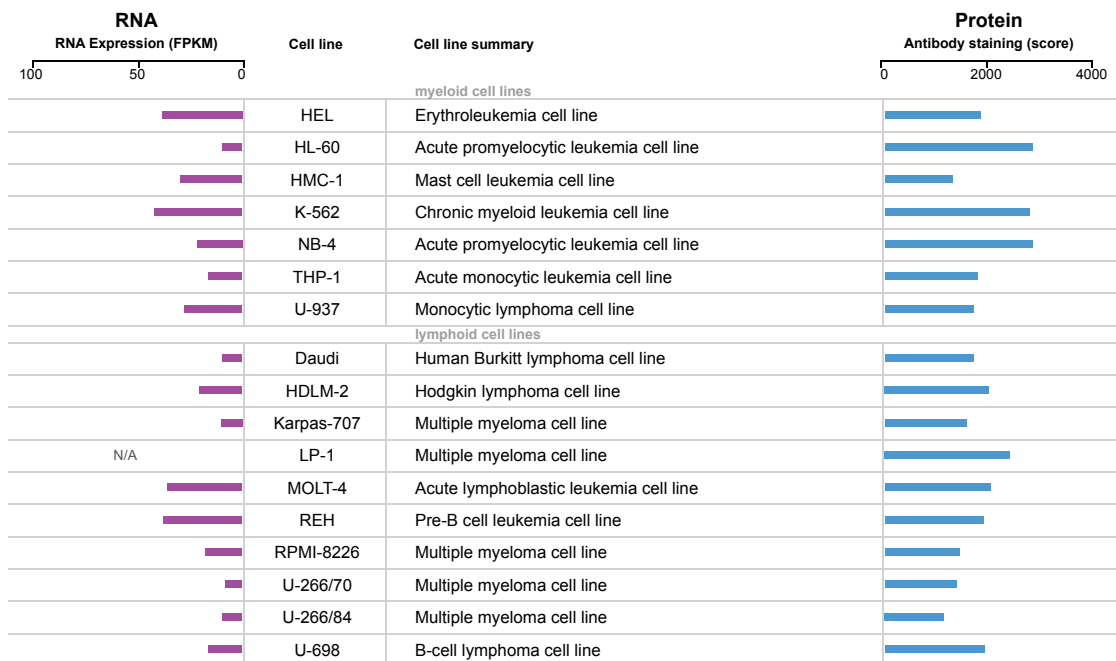

# RECQ5 expression

CELL LINE ATLAS ? »

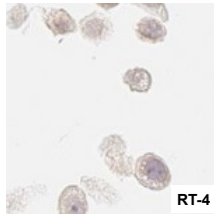

**Gene description**

RecQ protein-like 5

**RNA expression**

Transcript detected at medium/high level in 1 cell lines

**Protein expression**

Protein detected at only low levels

**Protein class**

Enzymes, Plasma proteins, Predicted intracellular proteins

**Reliability**

Supportive

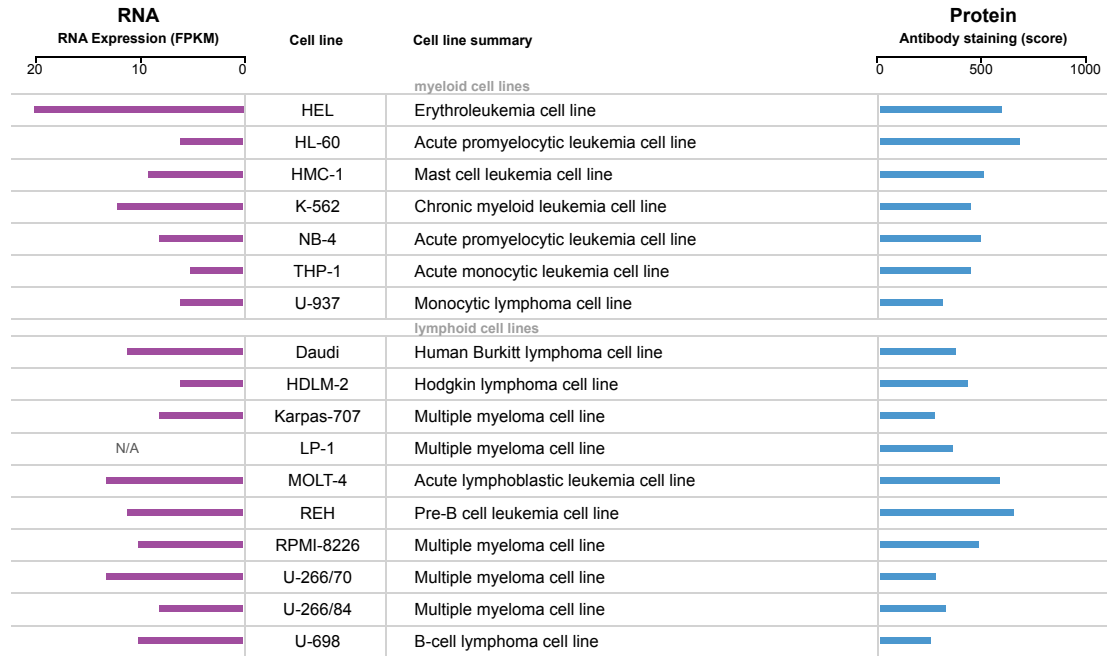

Supplement: MOESM1 [file 40364_2016_57_MOESM1_ESM.pdf]
